# Supplementary material for: Novel QTL Associated with Aerenchyma-Mediated Radial Oxygen Loss (ROL) in Rice (Oryza sativa L.) under Iron (II) Sulfide
Source: MDPI journal article supplement (doi:10.3390/plants11060788), 2022-03-16
Supplement: s1 [file s1]

# Novel QTL Associated with Aerenchyma-Mediated Radial Oxygen Loss (ROL) in Rice (*Oryza sativa* L.) under Iron (II) Sulfide

Dang Van Duyen <sup>2,†</sup>, Yongho Kwon <sup>1,†</sup>, Nkulu Rolly Kabange <sup>1,†,\*</sup>, Ji-Yoon Lee <sup>1</sup>, So-Myeong Lee <sup>1</sup>, Ju-Won Kang <sup>1</sup>, Hyeonjin Park <sup>1</sup>, Jin-Kyung Cha <sup>1</sup>, Jun-Hyeon Cho <sup>1</sup>, Dongjin Shin <sup>1</sup> and Jong-Hee Lee <sup>1,\*</sup>

<sup>1</sup> Department of Southern Area Crop Science, National Institute of Crop Science, RDA, Miryang, 50424, Korea; Y.H.K., [kwon6344@korea.kr](mailto:kwon6344@korea.kr); J.-Y.L., [minitia@korea.kr](mailto:minitia@korea.kr); S.M.L., [olivetti90@korea.kr](mailto:olivetti90@korea.kr); J.-W.K., [kangjw81@korea.kr](mailto:kangjw81@korea.kr); H.P., [tinapark@korea.kr](mailto:tinapark@korea.kr); J.K.C., [jknzz5@korea.kr](mailto:jknzz5@korea.kr); J.-H.C., [hy4779@korea.kr](mailto:hy4779@korea.kr); and D. J. S., [jacob1223@korea.kr](mailto:jacob1223@korea.kr)

<sup>2</sup> Molecular Biology Department, Agricultural Genetic Institute, Hanoi 11917, Vietnam; dangvanduyen79@gmail.com

\* Correspondence: N.R.K., [rollykabange@korea.kr](mailto:rollykabange@korea.kr), Tel.: +8210-5413-4881; [ccriljh@korea.kr](mailto:ccriljh@korea.kr), Tel.: +82-53-350-1169, Fax: +82-55-352-3059

† These authors contributed equally to this work.

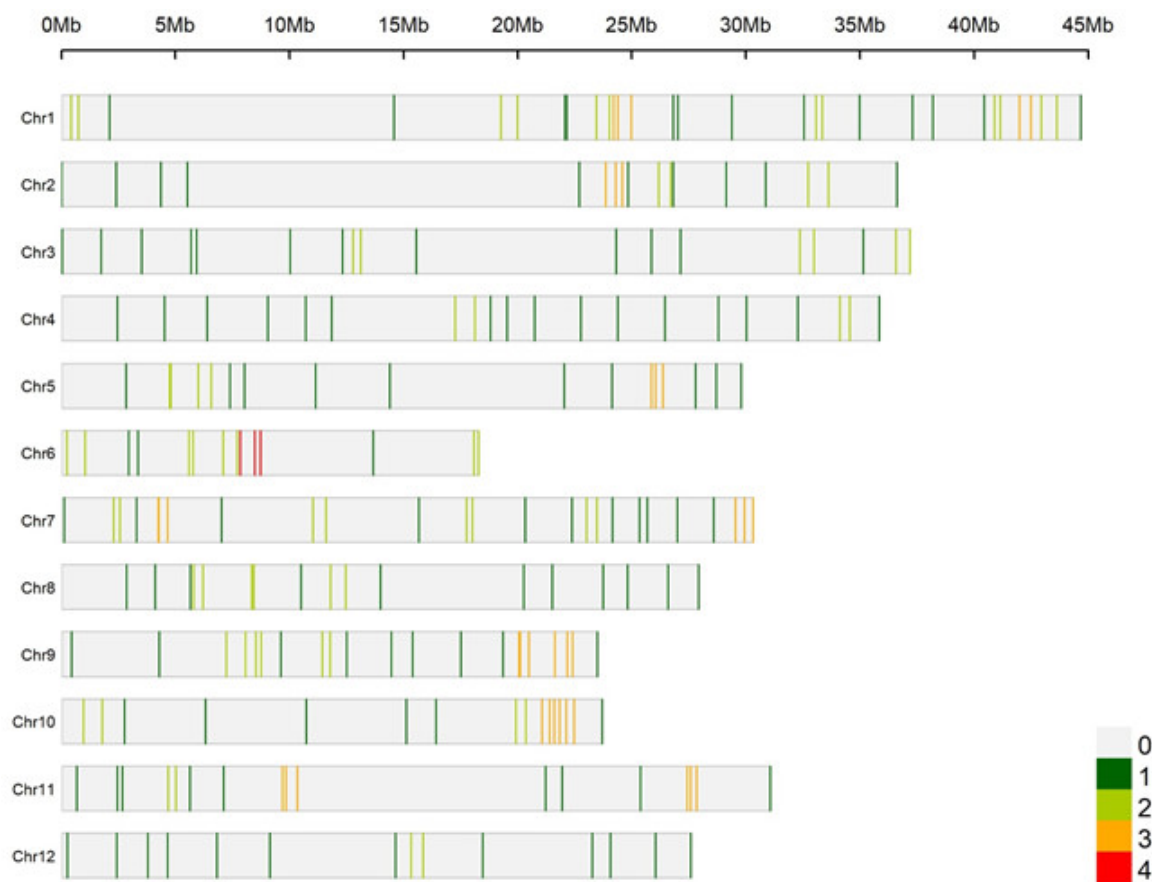

**Figure S1.** Density of Kompetitive Allele-Specific PCR (KASP) and Fluidigm markers across the rice genome.

**Table S1.** Results of Statistical Analysis of Traits in DH population

| Trait | Sample Size | Mean  | Variance | SE    | Skewness | Kurtosis | Min   | Max  | W-test |
|-------|-------------|-------|----------|-------|----------|----------|-------|------|--------|
| ROL   | 117         | 27.79 | 55.99    | 7.481 | 0.2001   | -0.2857  | 12.1  | 49   | 0.9791 |
| RA    | 117         | 8.35  | 3.20     | 1.789 | 0.3287   | -0.1947  | 4.283 | 13   | 0.9771 |
| RL    | 117         | 6.71  | 11.18    | 1.057 | -0.9184  | 0.8985   | 3.25  | 8.89 | 0.9407 |

ROL: radial oxygen loss; RA: root area; and RL: root length. W-test: the Shapiro–Wilk W-statistic for the test of normality of the distribution.

**Table S2.** Linkage groups and total length per chromosome

| Chromosome ID | Chromosome Name | No. of markers | Length (cM) |
|---------------|-----------------|----------------|-------------|
| 1             | Chromosome 1    | 29             | 207.95      |
| 2             | Chromosome 2    | 17             | 189.28      |
| 3             | Chromosome 3    | 20             | 204.8       |
| 4             | Chromosome 4    | 21             | 201.48      |
| 5             | Chromosome 5    | 17             | 139.66      |
| 6             | Chromosome 6    | 11             | 60.54       |
| 7             | Chromosome 7    | 27             | 210.84      |
| 8             | Chromosome 8    | 17             | 102.5       |
| 9             | Chromosome 9    | 19             | 101.21      |
| 10            | Chromosome 10   | 13             | 109.7       |
| 11            | Chromosome 11   | 16             | 130.12      |
| 12            | Chromosome 12   | 13             | 134.52      |
| Whole Genome  | Whole Genome    | 220            | 1792.6      |

**Table S3.** List of ROL candidate genes and primers sequences used for qPCR validation.

| Gene Name       | Locus ID       | Forward primer (5'→3') | Reverse primer (5'→3') | T <sub>m</sub> °C (F/R) | G-C contents % (F/R) | Amplicon size (bp) |
|-----------------|----------------|------------------------|------------------------|-------------------------|----------------------|--------------------|
| <i>OsTCP7</i>   | LOC_Os02g42380 | CCATGTCTACCAGCCCGTG    | TTGCTGTGCCGGTCCTTC     | 60.15/60.28             | 63.16/61.11          | 150                |
| <i>OsTRX</i>    | LOC_Os02g42700 | GCGGGCCATGCAAAATGATA   | TGTCGGGGTTTTCATCAGTGT  | 59.61/59.86             | 50.00/47.62          | 102                |
| <i>OsMYB21</i>  | LOC_Os02g42850 | GGTGGATCAACTACCTGCGG   | TCCTAGACCACTTGTTGCCG   | 60.46/59.68             | 60.00/55.00          | 108                |
| <i>OsPLIM2a</i> | LOC_Os02g42820 | GGGCAGCTACAACCACTTGA   | TCCTGTTCTTTCGCTGGC     | 60.25/60.32             | 55.00/55.00          | 102                |
| <i>OsDEF7</i>   | LOC_Os02g41904 | CCACAGGTTCAAGGGCATGT   | TTCTTGAGAAGCACTTGCG    | 60.54/59.69             | 55.00/50.00          | 120                |
| <i>OsARF8</i>   | LOC_Os02g41800 | CAGTCGAGCCTCATGTACCC   | CCCATTGTCAGGTCAGTGCT   | 59.90/59.96             | 60.00/55.00          | 95                 |
| <i>OsEXPA</i>   | LOC_Os02g42650 | AATTCGAGGATGGAGACGGC   | CCCCCAGATGTGCTTCATGT   | 59.89/60.03             | 55.00/55.00          | 89                 |
| <i>OsNIP2</i>   | LOC_Os02g41860 | GTGATCGGGTACAAGCACCA   | ATGAAGATCATGCCGCCGAA   | 60.04/60.18             | 55.00/50.00          | 110                |
| <i>Osclb5</i>   | LOC_Os02g42740 | GTAAAAGGCGACCGACAGGA   | CCTGGGAAAACGTCGTCAGA   | 60.04/59.97             | 55.00/55.00          | 88                 |
| <i>OsLRR2</i>   | LOC_Os02g42412 | CAGCAGCTGTGTTAGGATCAC  | GAGGGCATGACCGAACATCT   | 58.99/59.82             | 52.38/55.00          | 92                 |
| <i>OsWBC8</i>   | LOC_Os02g41920 | TCACAGTGGTGGTGTACTGG   | ACCCGACGTATCTCTTCACC   | 59.24/58.90             | 55.00/55.00          | 126                |
| <i>OsActin1</i> | LOC_Os05g36290 | CTAGCGGTGCAACAACCTGGT  | ACCGGAGGATAGCATGAGGA   | 57.5/57.5               | 55.00/55.00          | 102                |
